# Supplementary material
Source: PubMed Central journal article supplement (PMC7393639)

## Control Group

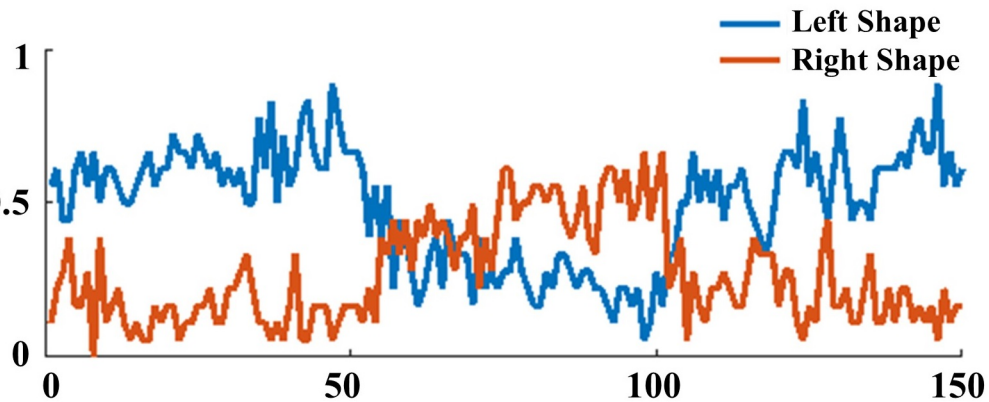

## PTSD Group

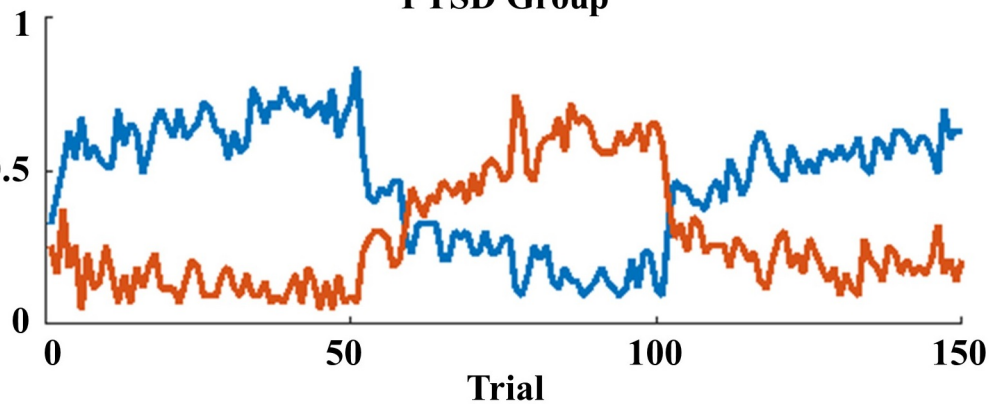

Supplement: NIHMS1590075-supplement-Supplemental_Material_1.pdf [file NIHMS1590075-supplement-Supplemental_Material_1.pdf]

**Difference Score**

0.06  
0.04  
0.02  
0  
-0.02  
-0.04  
-0.06

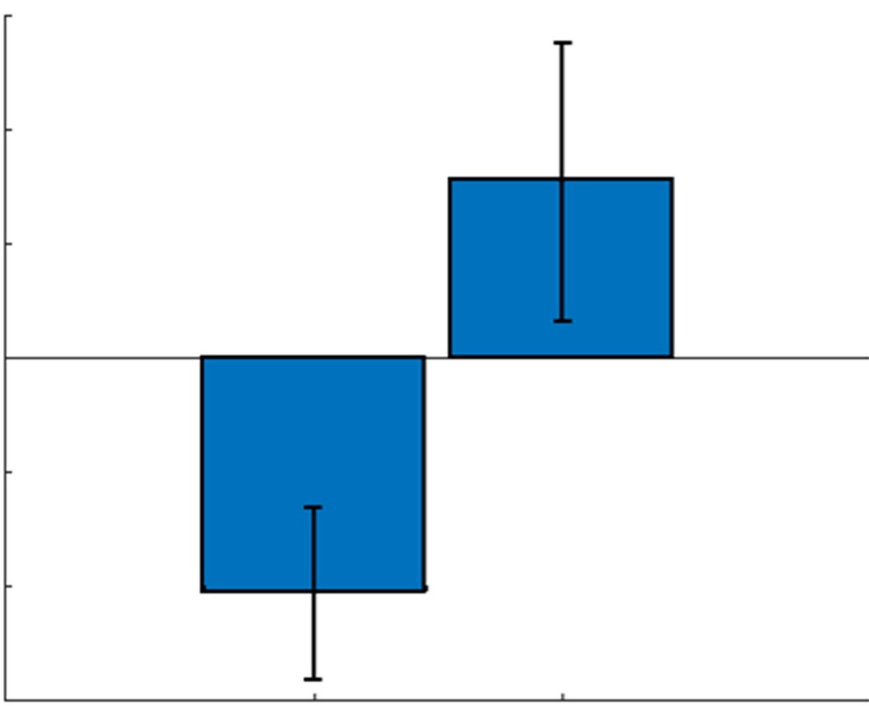

**PTSD Group Control Group**

Supplement: NIHMS1590075-supplement-Supplemental_Material_2.pdf [file NIHMS1590075-supplement-Supplemental_Material_2.pdf]

## Mean Choices

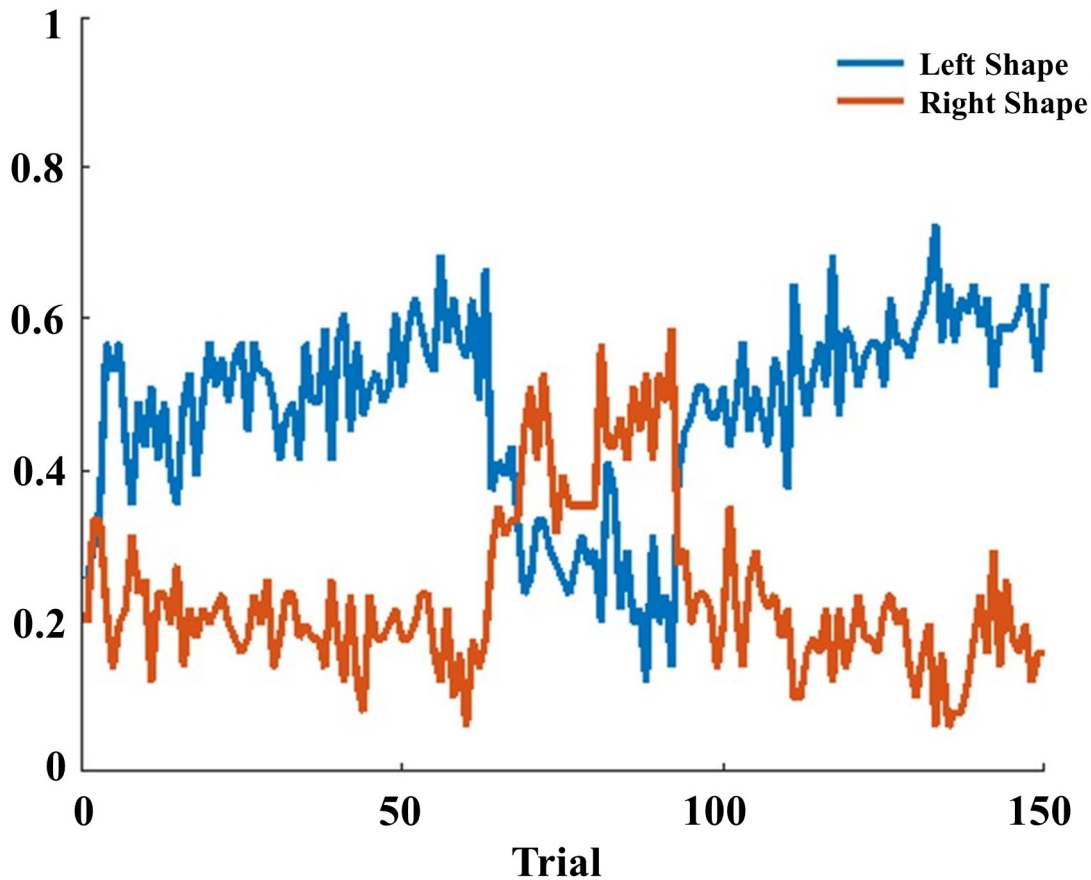

Supplement: NIHMS1590075-supplement-Supplemental_Material_3.pdf [file NIHMS1590075-supplement-Supplemental_Material_3.pdf]

**Difference Score**

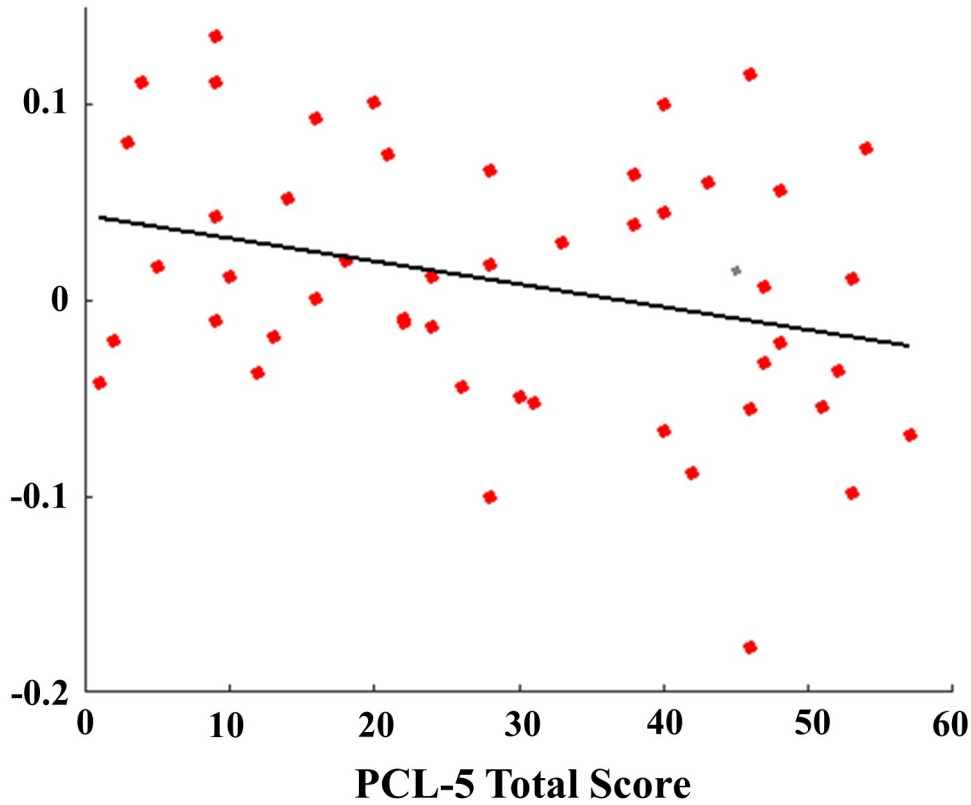

Supplement: NIHMS1590075-supplement-Supplemental_Material_4.pdf [file NIHMS1590075-supplement-Supplemental_Material_4.pdf]
